# Supplementary material
Source: MDPI journal article supplement (https://www.mdpi.com/2073-445X/7/2/72)
Supplement: s1 [file s1]

**Table S1.** Error matrix of classified vs reference data for (a) 1995, (b) 2005, and (c) 2015

| <b>(a) 1995</b>             |                             |                   |                   |                   |                     |
|-----------------------------|-----------------------------|-------------------|-------------------|-------------------|---------------------|
| Classified                  | Reference                   |                   |                   |                   | Classified<br>Total |
|                             | Agriculture<br>and built-up | Forest            | Waterbodies       | Other             |                     |
| Agriculture and<br>built-up | 71<br><b>0.40</b>           | 2<br><b>0.01</b>  | 3<br><b>0.02</b>  | 3<br><b>0.02</b>  | 79<br><b>0.45</b>   |
| Forest                      | 3<br><b>0.02</b>            | 63<br><b>0.47</b> | 0<br><b>0.00</b>  | 0<br><b>0.00</b>  | 66<br><b>0.49</b>   |
| Waterbodies                 | 0<br><b>0.00</b>            | 0<br><b>0.00</b>  | 53<br><b>0.04</b> | 4<br><b>0.00</b>  | 57<br><b>0.04</b>   |
| Other                       | 1<br><b>0.00</b>            | 0<br><b>0.00</b>  | 0<br><b>0.00</b>  | 46<br><b>0.02</b> | 47<br><b>0.02</b>   |
| Reference Total             | 75<br><b>0.42</b>           | 65<br><b>0.48</b> | 56<br><b>0.06</b> | 53<br><b>0.04</b> | 249<br><b>1.00</b>  |
| <b>(b) 2005</b>             |                             |                   |                   |                   |                     |
| Classified                  | Reference                   |                   |                   |                   | Classified<br>Total |
|                             | Agriculture<br>and built-up | Forest            | Waterbodies       | Other             |                     |
| Agriculture and<br>built-up | 70<br><b>0.39</b>           | 2<br><b>0.01</b>  | 1<br><b>0.01</b>  | 9<br><b>0.05</b>  | 82<br><b>0.46</b>   |
| Forest                      | 4<br><b>0.03</b>            | 63<br><b>0.46</b> | 0<br><b>0.00</b>  | 0<br><b>0.00</b>  | 67<br><b>0.49</b>   |
| Waterbodies                 | 1<br><b>0.00</b>            | 0<br><b>0.00</b>  | 53<br><b>0.04</b> | 4<br><b>0.00</b>  | 58<br><b>0.04</b>   |
| Other                       | 0<br><b>0.00</b>            | 0<br><b>0.00</b>  | 2<br><b>0.00</b>  | 40<br><b>0.01</b> | 42<br><b>0.01</b>   |
| Reference Total             | 75<br><b>0.42</b>           | 65<br><b>0.47</b> | 56<br><b>0.05</b> | 53<br><b>0.06</b> | 249<br><b>1.00</b>  |
| <b>(c) 2017</b>             |                             |                   |                   |                   |                     |
| Classified                  | Reference                   |                   |                   |                   | Classified<br>Total |
|                             | Agriculture<br>and built-up | Forest            | Waterbodies       | Other             |                     |
| Agriculture and<br>built-up | 71<br><b>0.37</b>           | 3<br><b>0.02</b>  | 1<br><b>0.00</b>  | 5<br><b>0.03</b>  | 80<br><b>0.42</b>   |
| Forest                      | 3<br><b>0.02</b>            | 62<br><b>0.49</b> | 0<br><b>0.00</b>  | 1<br><b>0.01</b>  | 66<br><b>0.52</b>   |
| Waterbodies                 | 0<br><b>0.00</b>            | 0<br><b>0.00</b>  | 54<br><b>0.04</b> | 3<br><b>0.00</b>  | 57<br><b>0.04</b>   |
| Other                       | 1<br><b>0.00</b>            | 0<br><b>0.00</b>  | 1<br><b>0.00</b>  | 44<br><b>0.02</b> | 46<br><b>0.02</b>   |
| Reference Total             | 75<br><b>0.39</b>           | 65<br><b>0.51</b> | 56<br><b>0.04</b> | 53<br><b>0.06</b> | 249<br><b>1.00</b>  |

Values in normal font represent number of sample units and values in bold represent estimated proportion of the entire area.
